# Supplementary material for: Green synthesis of polyimide by using an ethanol solvothermal method for aqueous zinc batteries
Source: Royal Society of Chemistry journal article supplement (doi:10.1039/d4ra02390k), 2024-01-01
Supplement: d4ra02390k1.pdf [file d4ra02390k1.pdf]

## **Green synthesis of Polyimide by using Ethanol Solvothermal Method for Aqueous Zinc Batteries**

Ya Zhao<sup>a</sup>, Chaoqiao Yang<sup>a</sup>, Hexiang Zhong<sup>a</sup>, Lin Li<sup>b</sup>, Jiangliang Hu<sup>b</sup>, Jiaxin Fan<sup>b,\*</sup>

<sup>a</sup>College of Environmental and Chemical Engineering, Dalian University, Dalian, 116622, Liaoning, China

<sup>b</sup>School of Chemistry and Materials Engineering, Liupanshui Normal University, Liupanshui, 553004, Guizhou, China

\*Corresponding author: [fmf\\_fjx@lpsy.edu.cn](mailto:fmf_fjx@lpsy.edu.cn)

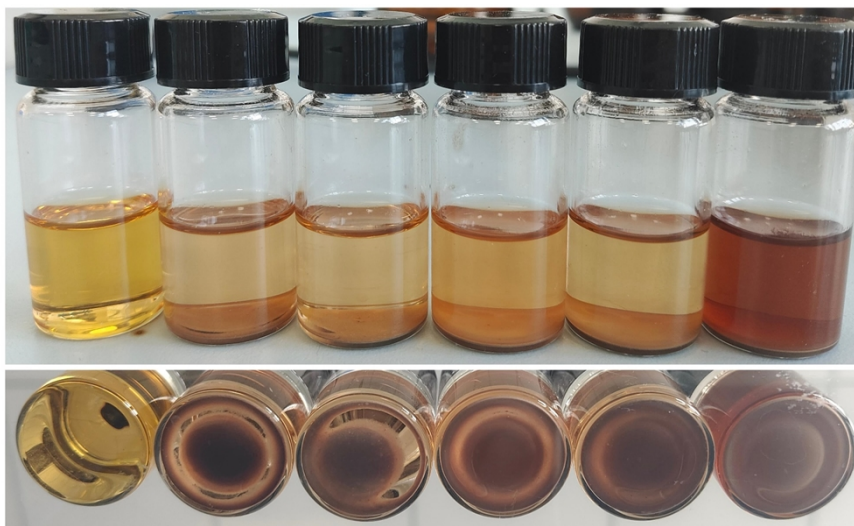

NTCDAs U-PI-0 U-PI-30 U-PI-50 U-PI-70 U-PI-100  
**Fig. S1 Solubility of NTCDAs, U-PIs in NMP Solvent over 25 days**

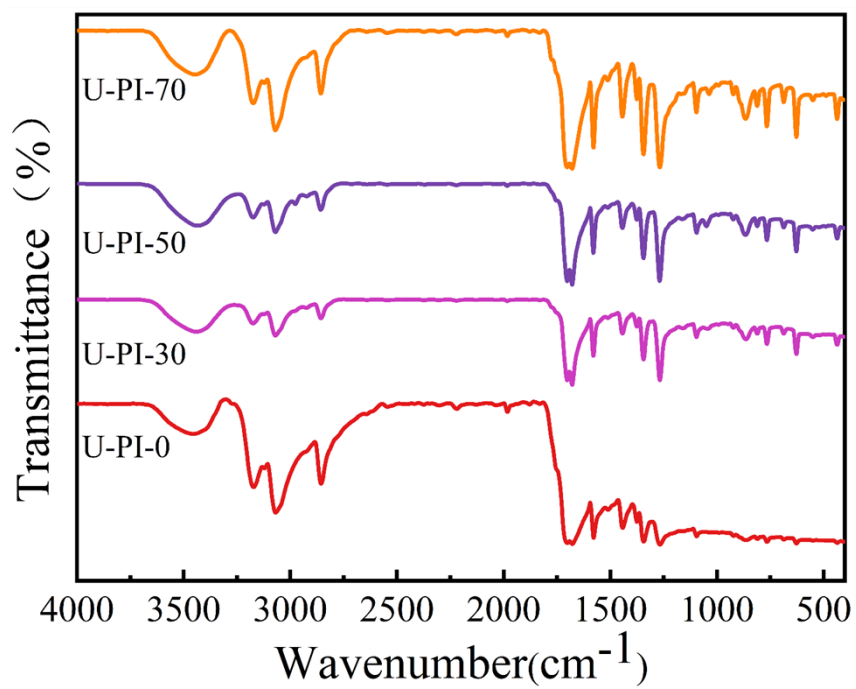

**Fig. S2 FTIR spectra**

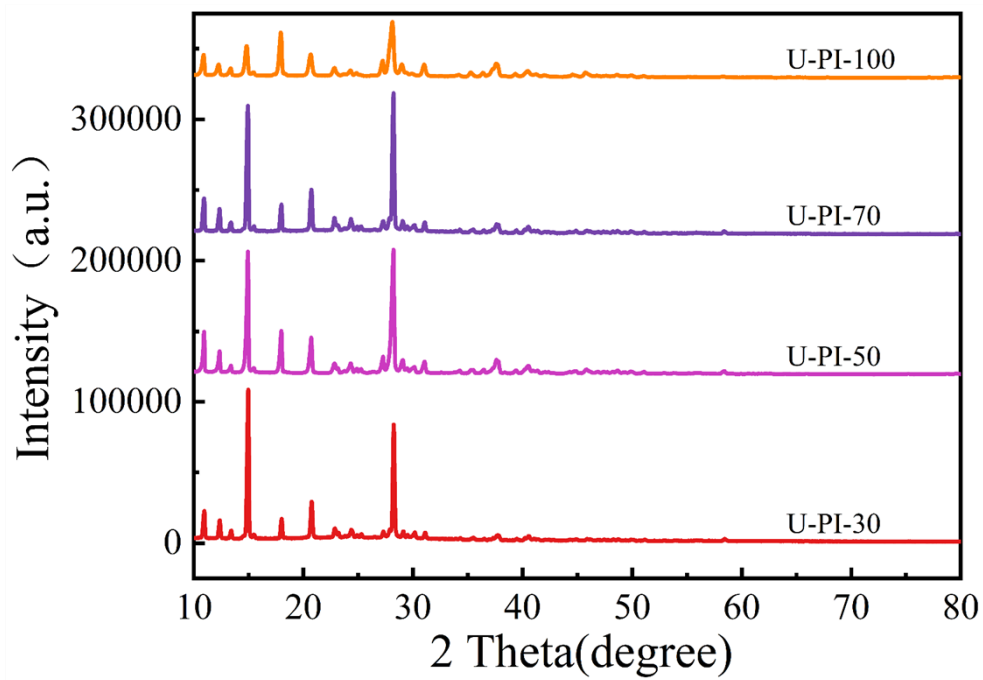

Fig. S3 XRD patterns

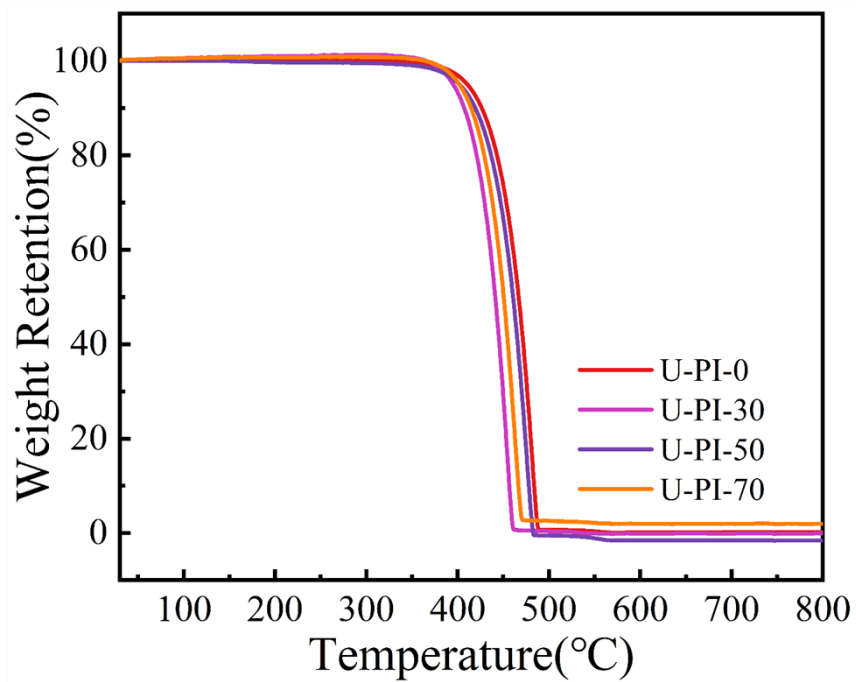

Fig. S4 TG curves

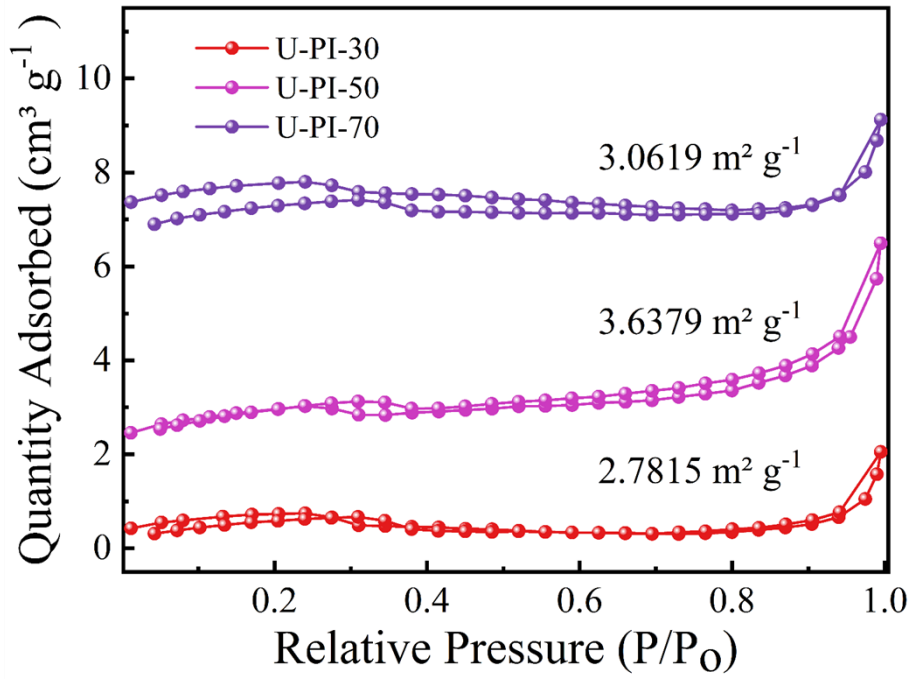

Fig. S5 BET curves

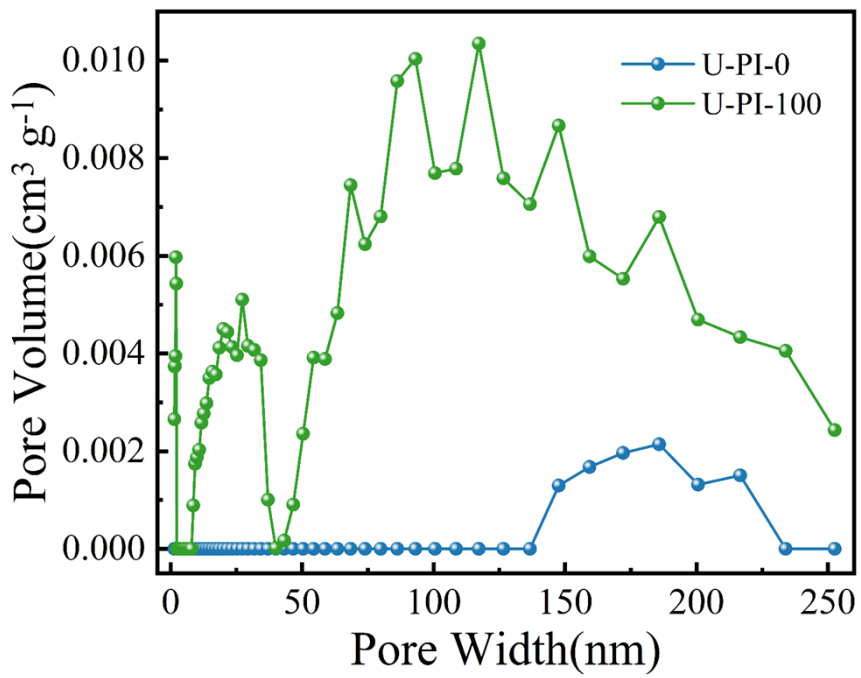

Fig. S6 Pore size distribution

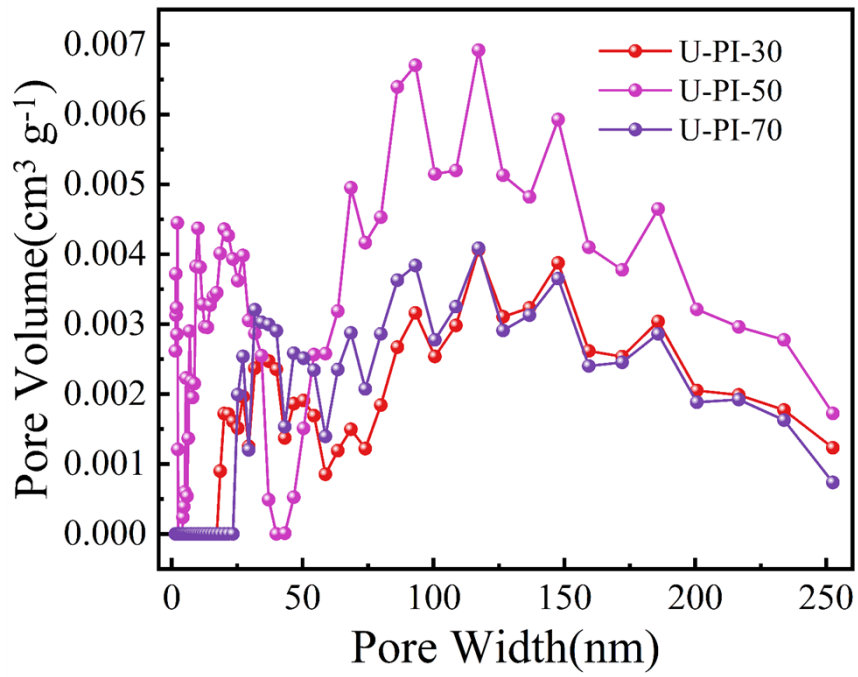

**Fig. S7 Pore size distribution**

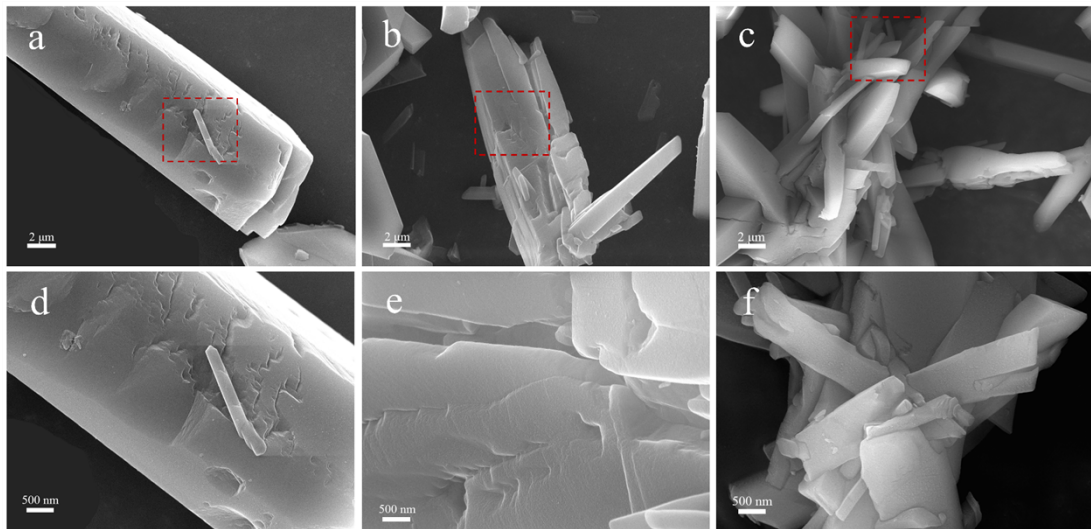

**Fig. S8 SEM image: (a) U-PI-0; (b) U-PI-30; (c) U-PI-70; (d) ~ (f) corresponding magnified SEM images**

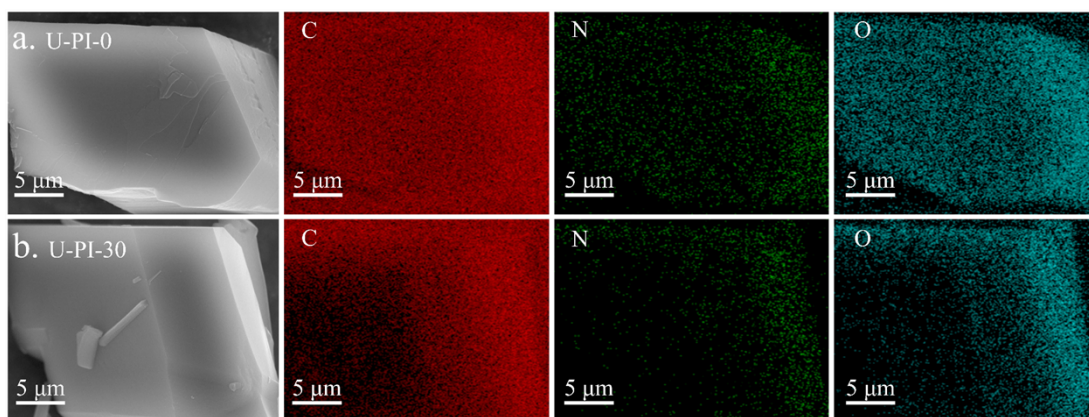

Fig. S9 EDS mapping of (a) U-PI-0, (b) U-PI-30

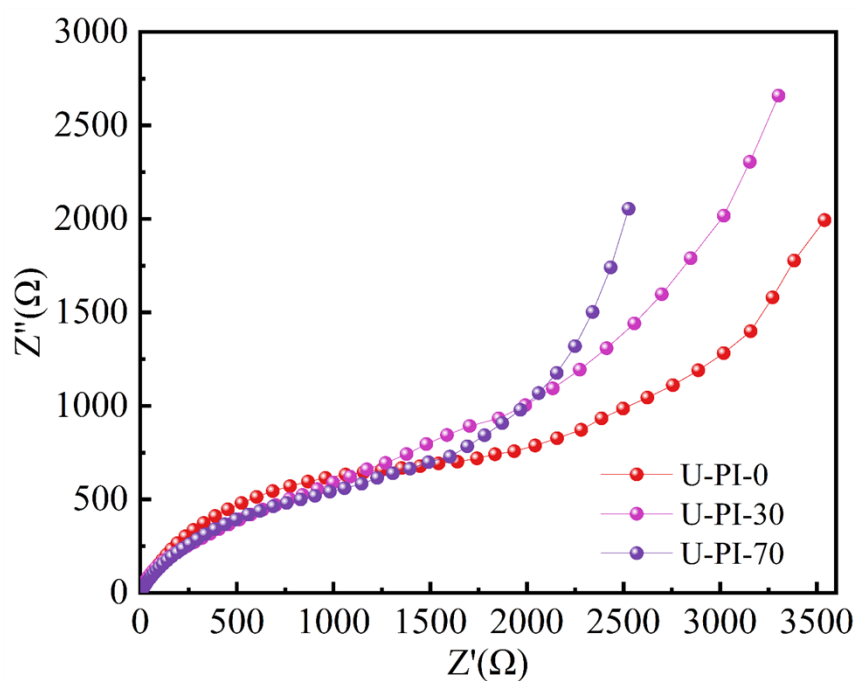

Fig. S10 Nyquist plots

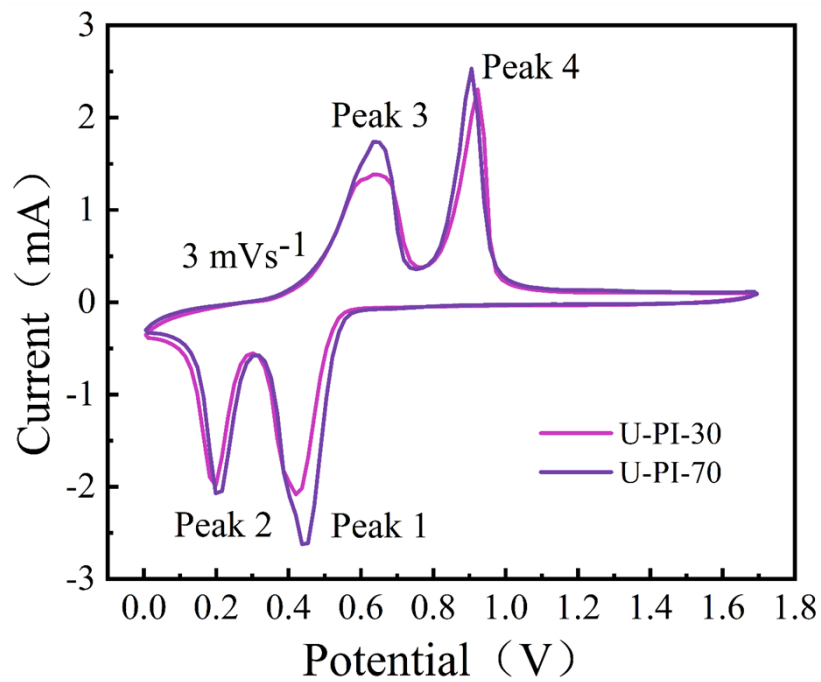

Fig. S11 CV curves

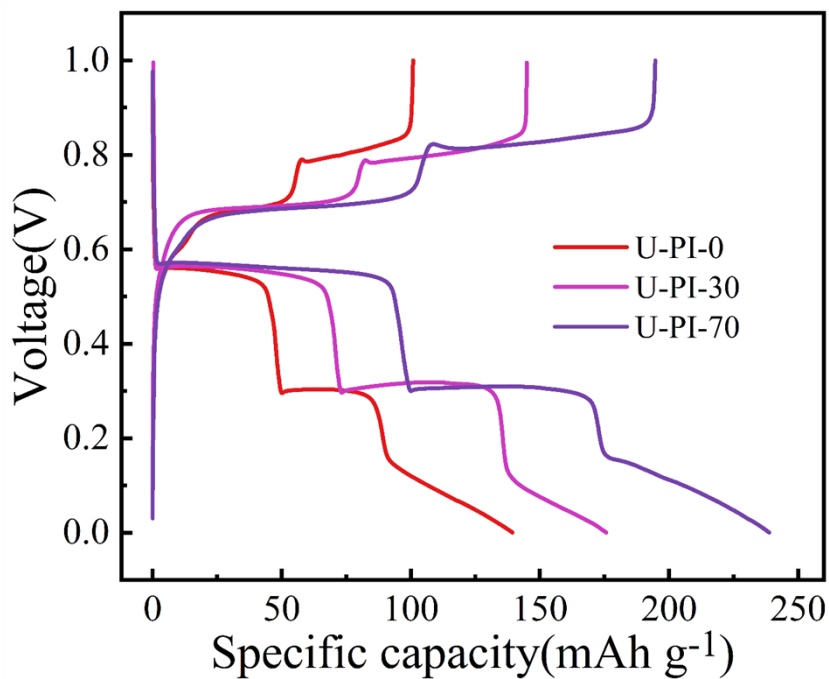

Fig. S12 GCD curves in the voltage range of 0-1 V at 0.05C

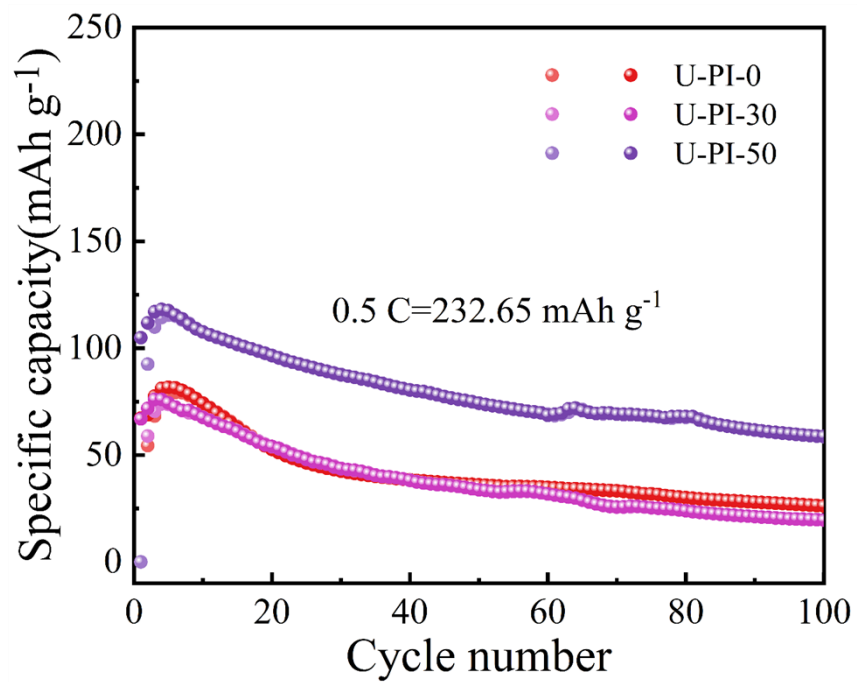

Fig. S13 Cycling performances

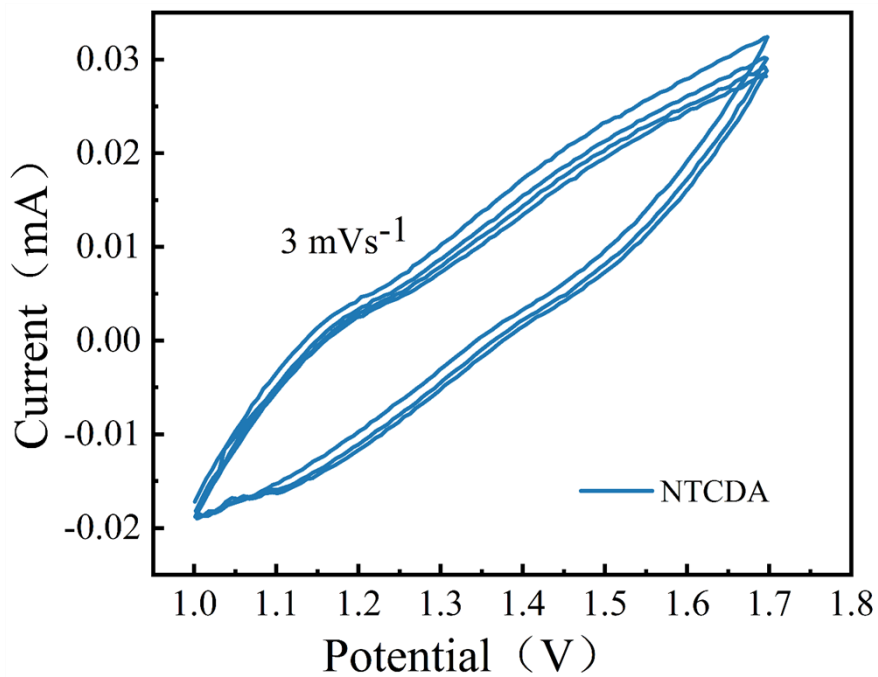

Fig. S14 CV curves



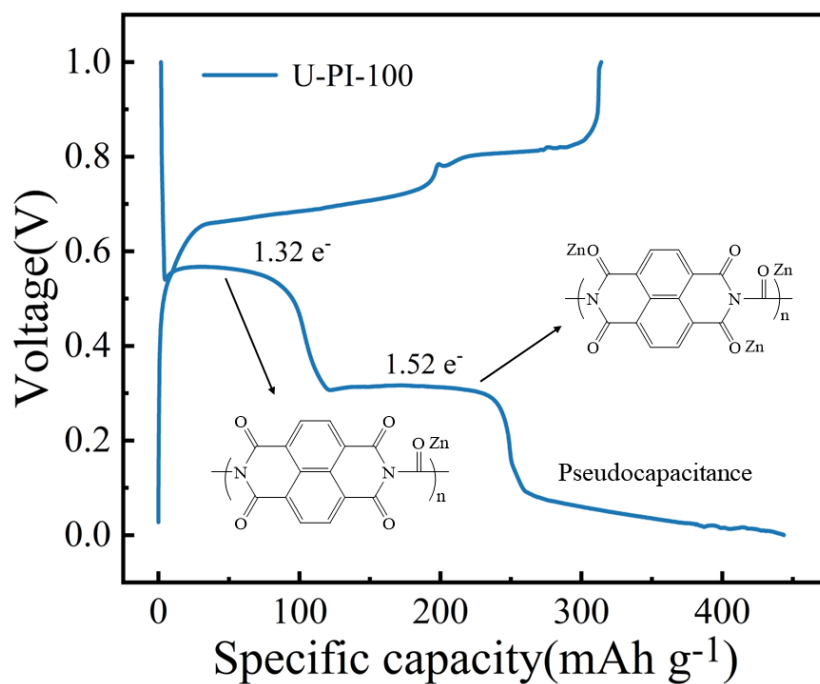

Fig. S15 The reduction reactions of U-PI-100 during the initial discharge process

Table S1 Organic Elemental Analysis of U-PI-100

|                   | N (%) | C (%)  | H (%) | O (%)  |
|-------------------|-------|--------|-------|--------|
| Theoretical value | 9.589 | 61.643 | 1.369 | 27.39  |
| Tested value      | 9.594 | 63.048 | 2.665 | 24.182 |

Table S2 The comparison between previous studies and this work

| Dianhydride | diamine          | Solvent                                                | Capacity (mAh g <sup>-1</sup> ) | Cycle performance                                                                                               | Ref. |
|-------------|------------------|--------------------------------------------------------|---------------------------------|-----------------------------------------------------------------------------------------------------------------|------|
| NTCDA       | Urea             | NMP                                                    | 174.5(20 mA g <sup>-1</sup> )   | (vs. Li/Li <sup>+</sup> )<br>50 mA g <sup>-1</sup> 60 cycles 153 mAh g <sup>-1</sup> (50 mA g <sup>-1</sup> )   | [1]  |
| NTCDA       | TAPBA/<br>MWCNTs | NMP /mesitylene /<br>iso-quinoline                     | 98.4(0.1 A g <sup>-1</sup> )    | (vs. Na/Na <sup>+</sup> )<br>100 cycles 93.8 mAh g <sup>-1</sup>                                                | [2]  |
| NTCDA       | TAPA/CNT         | Dimethylimidazoli<br>done/mesitylene/i<br>so-quinoline | 104.4(0.1 A g <sup>-1</sup> )   | (vs. Li/Li <sup>+</sup> )<br>8000 cycles 100 mAh g <sup>-1</sup>                                                | [3]  |
| NTCDA       | EDA              | NMP                                                    | 112.0(50 mA g <sup>-1</sup> )   | (vs. Mg/Mg <sup>2+</sup> )<br>100 cycles 113 mAh g <sup>-1</sup>                                                | [4]  |
| NTCDA       | TAPB             | NMP                                                    | 70.6(25 mA g <sup>-1</sup> )    | (vs. Li/Li <sup>+</sup> )<br>1.5 A g <sup>-1</sup> 10000 cycles 40 mAh g <sup>-1</sup> (1.5 A g <sup>-1</sup> ) | [5]  |

|       |                           |                            |                                 |                            |                                                               |           |
|-------|---------------------------|----------------------------|---------------------------------|----------------------------|---------------------------------------------------------------|-----------|
| NTCDA | 2,5-Diamino-benzoquinone  | quinoline                  | 180.0(43.3 mA g <sup>-1</sup> ) | (vs. Li/Li <sup>+</sup> )  | 80 cycles 85 mAh g <sup>-1</sup>                              | [6]       |
| NTCDA | EDA/G                     | NMP                        | 142.0(100 mA g <sup>-1</sup> )  | (vs. K/K <sup>+</sup> )    | 100 cycles 137 mAh g <sup>-1</sup>                            | [7]       |
| PTCDA | Urea                      | DMF                        | 107.0(0.05 A g <sup>-1</sup> )  | (vs. Zn/Zn <sup>2+</sup> ) | 100 cycles 26 mAh g <sup>-1</sup>                             | [8]       |
| NTCDA | 1,2-Diamino-anthraquinone | NMP                        | 192.9(0.05 A g <sup>-1</sup> )  | (vs. Zn/Zn <sup>2+</sup> ) | 50 cycles 133.5 mAh g <sup>-1</sup>                           | [9]       |
| NTCDA | AQ-NH <sub>2</sub>        | Zinc acetate<br>/imidazole | 191.9(50 mA g <sup>-1</sup> )   | (vs. Zn/Zn <sup>2+</sup> ) | 100 cycles 167.2 mAh g <sup>-1</sup>                          | [10]      |
| PTCDA | EDA                       | NMP                        | 91.0(0.05 A g <sup>-1</sup> )   | (vs. Zn/Zn <sup>2+</sup> ) | 1500 cycles 53 mAh g <sup>-1</sup> (1 A g <sup>-1</sup> )     | [11]      |
| NTCDA | Urea                      | ethanol                    | 378.9(23.3 mA g <sup>-1</sup> ) | (vs. Zn/Zn <sup>2+</sup> ) | 200 cycles 40.7 mAh g <sup>-1</sup> (0.46 A g <sup>-1</sup> ) | This work |

[1] C. Chen, X. Zhao, H.-B. Li, F. Gan, J. Zhang, J. Dong and Q. Zhang, *Electrochimica Acta*, 2017, 229, 387-395.

[2] L. Chen, Y. Li, X. Wang, J. Wu, Y. Ding, S.-B. Ren, L. Zhang, Z. Xu, B. Chen, D.-M. Han and Y.-p. Wu, *Chemical Engineering Journal*, 2023, 464, 142658.

[3] G. Wang, N. Chandrasekhar, B. P. Biswal, D. Becker, S. Paasch, E. Brunner, M. Addicoat, M. Yu, R. Berger and X. Feng, *Advanced Materials*, 2019, 31, 1901478.

[4] S. Cui, T. Li, D. Tao, D. Zhang, Y. Cao and F. Xu, *ACS Materials Letters*, 2024, 6, 1883-1889.

[5] S. Lei, Y. Dong, Y. Dou, X. Zhang, Q. Zhang and Y. Yang, *Materials Advances*, 2021, 2, 5785-5790.

[6] A. V. Mumyatov, A. F. Shestakov, N. N. Dremova, K. J. Stevenson and P. A. Troshin, *Energy Technology*, 2019, 7, 1801016.

[7] Y. Hu, H. Ding, Y. Bai, Z. Liu, S. Chen, Y. Wu, X. Yu, L. Fan and B. Lu, *ACS Appl Mater Interfaces*, 2019, 11, 42078-42085.

[8] H. Huang, K. Wu, R. Ma, J. Huang, X. Zhang, L. Li, Y. Liu and C. Xiong, *Advanced Powder Technology*, 2022, 33, 103878.

[9] J. Wang, H. Lv, L. Huang, J. Li, H. Xie, G. Wang and T. Gu, *ACS Appl Mater*

*Interfaces*, 2023, 15, 49447-49457.

[10] Q. Feng, Y. Cao, C. Guo, L. Chen, W. Sun and Y. Wang, *ACS Applied Energy Materials*, 2023, 6, 7899-7907.

[11] B. Jiang, T. Huang, P. Yang, X. Xi, Y. Su, R. Liu and D. Wu, *Journal of Colloid and Interface Science*, 2021, 598, 36-44.
